# Supplementary material for: Size effects in plasma-enhanced nano-transfer adhesion
Source: Royal Society of Chemistry journal article supplement (doi:10.1039/c8sm01862f), 2018-01-01
Supplement: c8sm01862f1.pdf [file c8sm01862f1.pdf]

# Size effects in plasma-enhanced nano-transfer adhesion of PDMS

Michael E. Deagen, Edwin P. Chan, Linda S. Schadler, and Chaitanya K. Ullal\*

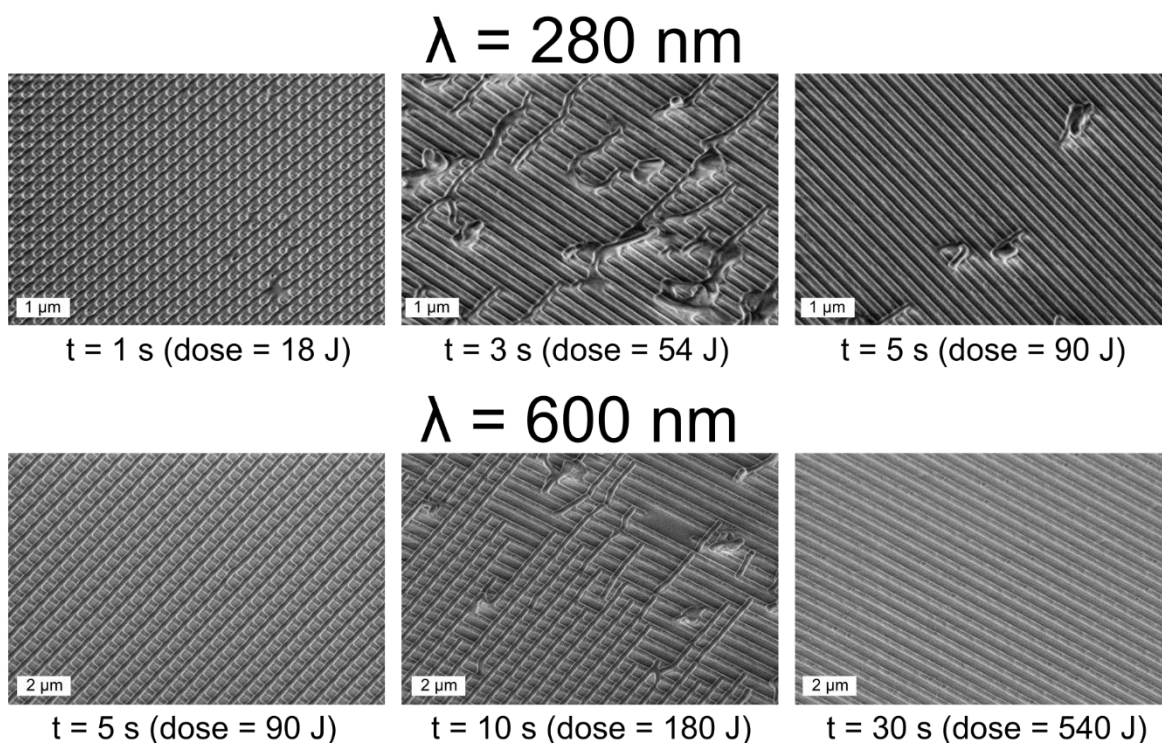

Figure S1 Transition region between successful transfer and brittle delamination as plasma dose is increased. For smaller features, the transition occurs at lower plasma dose.

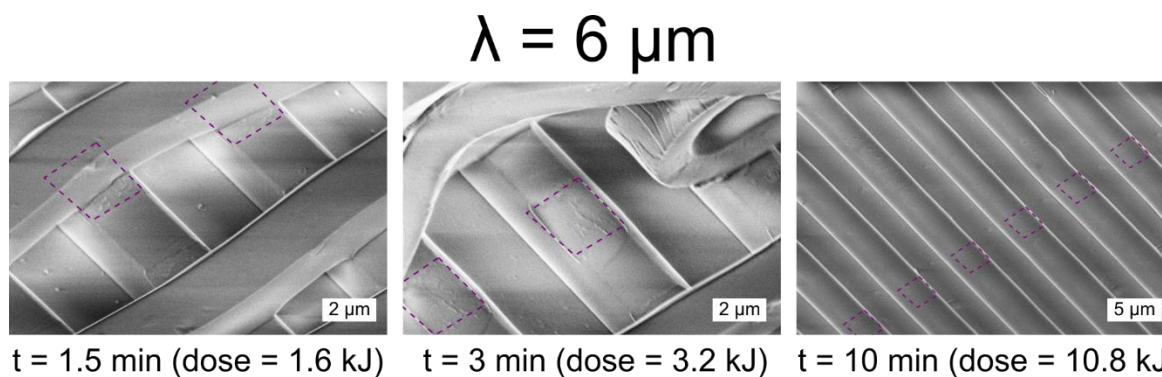

Figure S2 Delamination of 6- $\mu\text{m}$  period lines at high plasma doses, with the interlayer interface prior to delamination outlined with dashed lines.
